# Supplementary material for: Genome-Wide Analysis of the AP2/ERF Gene Family in Physic Nut and Overexpression of the JcERF011 Gene in Rice Increased Its Sensitivity to Salinity Stress
Source: PubMed Central journal article supplement (PMC4778941; doi:10.1371/journal.pone.0150879), 2016-03-04

**S3 Fig. Overexpression of *JcERF011* caused dwarf phenotype in Arabidopsis.**

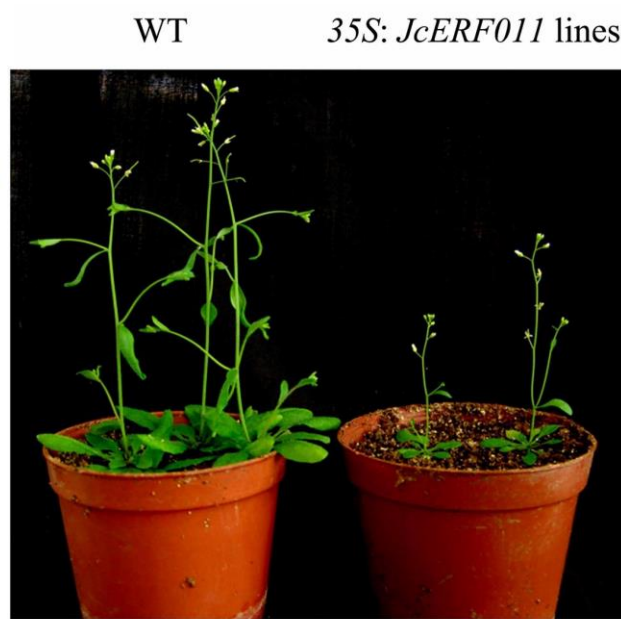

Supplement: pone.0150879.s003.pdf [file pone.0150879.s003.pdf]
