# Supplementary material for: Genome-Wide Analysis of the AP2/ERF Gene Family in Physic Nut and Overexpression of the JcERF011 Gene in Rice Increased Its Sensitivity to Salinity Stress
Source: PLoS One. 2016 Mar 4;11(3):e0150879. doi: 10.1371/journal.pone.0150879 (PMC4778941; doi:10.1371/journal.pone.0150879)
Supplement: S3 Table — (XLSX) [file pone.0150879.s006.xlsx]

## Sheet:  S3A Table
S3 Table . Orthologous groups of AP2/ERF genes from physic nut and six other species.
(A) Classification of AP2/ERF genes from physic nut and their orthologs from six species.
Family-Group	Subfamily-Subgroup	Physic nut				Ricinus communis	Arabidopsis			Oryza sativa		Vitis vinifera ( Licausi et al., 2010)			Physcomitrella patens				Chlamydomonas reinhardtii
		Gene name	Exon-Intron model (Figure S4B)	LGs	Tandem duplicators	Locus in phytozome (http://phytozome.jgi.doe.gov/pz/portal.html)	Locus Identifier	Classification by Nakano et al., (2006)	Classification by Sakuma et al., (2002)	TIGR Locus identifier	Classification by Nakano et al., (2006)	Gene name (Licausi et al., 2010)	Classification	Vitis chromosome location	Classification	Gene name (abbreviation)	Transcript name (V6.1) (http://phytozome.jgi.doe.gov/pz/portal.html)	Exon-Intron model (Fig 2)	Classification	Gene name (abbreviation)	Transcript name (http://phytozome.jgi.doe.gov/pz/portal.html)
DREB (Group A)	Ia	JcERF033		7		29983.m003227	AT2G20880	Ia	A-6	LOC_Os02g42585	Ia	VvERF001	I	chr19 3328049 3328963 -	I	p187 47	Pp1s187_47	1	Group B (ERF subfamily)	Cg16127	g16127.t1
	Ia						AT4G28140	Ia	A-6	LOC_Os04g44670	Ia				I	p221 67	Pp1s221_67	1		C14g62050	Cre14.g620500.t1.2
	Ib	JcERF031		1		29904.m002941	AT1G22190	Ib	A-6	LOC_Os02g51670	Ib	VvERF002	I	chr2 1080114 1081070 -	I	p335 8	Pp1s335_8	1		C16g66165	Cre16.g661650.t1.3
	Ib	JcERF032		9		30190.m010825	AT1G36060	Ib	A-6	LOC_Os03g09170	Ib	VvERF003	I	chr7_random 169670 171493 -						C06g275500	Cre06.g275500.t1.2
	Ib	JcERF034		4		29908.m006005	AT1G64380	Ib	A-6	LOC_Os05g49700	Ib	VvERF004	I	chr18 4166209 4167875 +						C08g364400	Cre08.g364400.t1.3
	Ib	JcERF035		7		28206.m000104	AT1G78080	Ib	A-6	LOC_Os06g11860	Ib	VvERF005	I	chr5 13746227 13747555 -						C07g353500	Cre07.g353500.t1.3
	Ib						AT2G22200	Ib	A-6	LOC_Os08g31580	Ib									Cg15714	g15714.t1
	Ib						AT4G13620	Ib	A-6	LOC_Os09g20350	Ib								AP2-like famlily
	Ib						AT4G39780	Ib	A-6	LOC_Os10g22600	Ib								four AP2 domains	C10g4413	Cre10.g441300.t1.3
	Ib						AT5G65130	Ib	A-6										two AP2 domains	C1g00965	Cre01.g009650.t1.2
	IIa	JcERF017		7	T10	28718.m000038	AT5G67190	IIa	A-5	LOC_Os04g55520	IIa	VvERF007	II	chr7 11530595 11531053 +	II	p1 34	Pp1s1_34	0	two AP2 domains	Cg241	g241.t1
	IIa	JcERF018		4		30170.m013843	AT1G46768	IIa	A-5	LOC_Os06g07030	IIa	VvERF006	II	chr18 8373449 8392940 +	II	p15 214	Pp1s15_214	0	two AP2 domains (one incomplete)	C16g667900	Cre16.g667900.t1.3
	IIa						AT2G23340	IIa	A-5			VvERF013	II	chr18 8392514 8392940	II	p17 332	Pp1s17_332	0	two AP2 domains (one incomplete)	C17g729600	Cre17.g729600.t1.3
	IIa						AT3G50260	IIa	A-5						II	p174 79	Pp1s174_79	0	single AP2 domain	C02g100100	Cre02.g100100.t1.3
	IIa						AT4G06746	IIa	A-5						II	p179 56	Pp1s179_56	0	single AP2 domain	C08g385350	Cre08.g385350.t1.1
	IIa						AT4G36900	IIa	A-5						II	p199 50	Pp1s199_50	3	single AP2 domain	C1g023100	Cre01.g023100.t1.3
	IIb-1	JcERF023		11	T15	29739.m003716	AT1G19210	IIb	A-5	LOC_Os02g54050	IIb	VvERF009	II	chr11 622859 623476 +	II	p225 102	Pp1s225_102	0	single AP2 domain	C8g383000	Cre08.g383000.t2.1
	IIb-1	JcERF024		11	T15	29739.m003647	AT1G74930	IIb	A-5	LOC_Os06g09717	unknown	VvERF011	II	chr4 1832514 1852272 -	II	p243 70	Pp1s243_70	0	single AP2 domain	Cg14565	g14565.t1
	IIb-1						AT4G31060	IIb	A-5	LOC_Os06g09760	IIb				II	p249 80	Pp1s249_80	0	single AP2 domain	Cg18137	g18137.t1
	IIb-1						AT5G21960	IIb	A-5	LOC_Os06g09790	IIb				II	p26 306	Pp1s26_306	3	single AP2 domain	Cg2885	g2885.t1
	IIb-1									LOC_Os06g09810	IIb				II	p276 57	Pp1s276_57	0	single AP2 domain	Cg4457	g4457.t1
	IIb-1									LOC_Os06g11940	IIb				II	p373 18	Pp1s373_18	0
	IIb-1									LOC_Os08g35240	IIb				II	p45 159	Pp1s45_159	5
										LOC_Os08g41030	XIV				II	p61 230	Pp1s61_230	0
	IIb-2	JcERF019		4		29908.m006165	AT1G21910	IIb	A-5	LOC_Os03g15660	IIb	VvERF008	II	chr18 3172181 3177603 +	II	p70 17	Pp1s70_17	0
	IIb-2						AT1G44830	IIb	A-5	LOC_Os06g10780	IIb				II	p79 169	Pp1s79_169	0
	IIb-2						AT1G77640	IIb	A-5						II	p83 10	Pp1s83_10	3
	IIb-3	JcERF022		11	T15	29739.m003717						VvERF010	II	chr11 630589 631251 +	II	p98 22	Pp1s98_22	0
	IIc	JcERF020		10		29938.m000611	AT1G22810	IIc	A-5	LOC_Os01g66270	IIc	VvERF012	II	chr18 17276434 17276922
	IIc	JcERF021		4			AT1G71520	IIc	A-5	LOC_Os05g34730	IIc
	IIIa-1	JcERF013		4	T5	27805.m000021	AT1G71450	IIIa	A-4	LOC_Os02g35240	IIIb	VvERF016	III	Chr18 16785242 16785789 -	III	p112 23	Pp1s112_23	1
	IIIa-1	JcERF014		4	T5	28118.m000034	AT1G33760	IIIa	A-5	LOC_Os04g36640	IIIb	VvERF014	III	chr18 16772806 16773341 -	III	p132 34	Pp1s132_34	1
	IIIa-1									LOC_Os11g13840	IIIb	VvERF017	III	chr18 14271875 14291042 -	III	p14 458	Pp1s14_458	1
	IIIa-2	JcERF006		8		29742.m001400	AT1G01250	IIIa	A-4			VvERF015	III	chrUn_random 51201144 51201767 +	III	p15 234	Pp1s15_234	1
	IIIb	JcERF007		6	T8	29092.m000462	AT1G12630	IIIb	A-4	LOC_Os02g45420	IIIb	VvERF018	III	chr2 3849494 3850054 +	III	p181 69	Pp1s181_69	1
	IIIb	JcERF015		9	T13	30190.m011121	AT1G63040	IIIb	A-4			VvERF019	III	chr16_random 4321713 4322426 +	III	p276 50	Pp1s276_50	1
	IIIb	JcERF016		5	T6	30147.m014311	AT2G36450	IIIb	A-4			VvERF020	III	chr8 16731040 16731639 -	III	p41 212	Pp1s41_212	1
	IIIb						AT5G52020	IIIb	A-4						III	p95 69-3	Pp1s95_69	0
	IIIc	JcERF001		9	T13	30190.m011120	AT1G12610	IIIc	A-1	LOC_Os01g73770	IIIc	VvERF021	III	chr2 3874834 3875568 +	Ax	p117 19	Pp1s117_19	2
	IIIc	JcERF002		9	T13	30190.m011119	AT1G63030	IIIc	A-1	LOC_Os02g45450	IIIc	VvERF022	III	chr16_random 4345734 4346390 +	Ax	p117 23	Pp1s117_23	0
	IIIc	JcERF003		5	T6	30147.m014313	AT4G25470	IIIc	A-1	LOC_Os04g48350	IIIc	VvERF023	III	chr19_random 273467 274027 -	Ax	p133 11	Pp1s133_11	0
	IIIc	JcERF004		2		60638.m00016	AT4G25480	IIIc	A-1	LOC_Os06g03670	IIIc	VvERF024	III	chr17 9018037 9018516 -	Ax	p14 196	Pp1s14_196	0
	IIIc	JcERF005		6	T8	29092.m000466	AT4G25490	IIIc	A-1	LOC_Os06g06970	unknown	VvERF025	III	chr11 1736911 1738182 +	Ax	p15 186	Pp1s15_186	0
	IIIc						AT5G51990	IIIc	A-1	LOC_Os08g43200	IIIc	VvERF026	III	chr6 23457372 23458091 -	Ax	p15 189	Pp1s15_189	0
	IIIc									LOC_Os08g43210	IIIc	VvERF027	III	chr6 23419660 23420695 -	Ax	p155 21	Pp1s155_21	0
	IIIc									LOC_Os09g35010	IIIc				Ax	p259 94	Pp1s259_94	0
	IIIc									LOC_Os09g35020	IIIc				Ax	p259 96	Pp1s259_96	0
										LOC_Os10G38000	IIIc
	IIIc									LOC_Os09g35030	IIIc				Ax	p276 3	Pp1s276_3	0
	IIId	JcERF008		9		28353.m000054	AT2G35700	IIId	A-4	LOC_Os01g10370	IIId	VvERF029	III	chr15 3476478 3477077 +	Ax	p296 32	Pp1s296_32	0
	IIId	JcERF009		8		30174.m008790	AT2G44940	IIId	A-4	LOC_Os10g41130	IIId	VvERF031	III	chrUn_random 60582050 60591387 +	Ax	p480 12	Pp1s480_12	0
	IIId						AT3G60490	IIId	A-4	LOC_Os02g43940	IIId	VvERF033	III	chrUn_random 89995122 89995842 +	Ax	p480 16	Pp1s480_16	0
	IIId						AT4G16750	IIId	A-4	LOC_Os02g43970	IIId	VvERF028	III	chrUn_random 36832047 36835692 -	Ax	p55 253	Pp1s55_253	0
	IIId									LOC_Os04g46400	IIId				Ax	p55 256	Pp1s55_256	0
	IIId									LOC_Os04g46410	IIId	? VvERF030	III	chrUn_random 60570977 60571654 +	Ax	p60 269	Pp1s60_269	0
	IIId									LOC_Os04g46440	IIId	? VvERF032	III	chrUn_random 89985560 89996238 +	Ax	p8 127	Pp1s8_127	0
	IIIe	JcERF010		2		30146.m003535	AT1G77200	IIIe	A-4	LOC_Os02g13710	IIIe	VvERF034	III	chr9 3602291 3621453 -
	IIIe	JcERF011		11		29794.m003381	AT2G25820	IIIe	A-4	LOC_Os06g36000	IIIe	VvERF035	III	chr4 2792234 2816348 -
	IIIe	JcERF012		11		29912.m005463	AT3G16280	IIIe	A-4
	IIIe						AT4G32800	IIIe	A-4
	IIIe						AT5G11590	IIIe	A-4
	IIIe						AT5G25810	IIIe	A-4
	IVa-1	JcERF030	5`-UTR	10		29729.m002292	AT3G11020	IVa	A-2	LOC_Os05g27930	IVb	no			IV	p120 13	Pp1s120_13	5
	IVa-1						AT5G05410	IVa	A-2						IV	p162 92	Pp1s162_92	0
	IVa-2	JcERF029		6		29820.m001008	AT2G38340	IVa	A-2	LOC_Os01g07120	IVa	VvERF037	IV	chr13 1064629 1065729 -	IV	p23 27	Pp1s23_27	5
	IVa-2									LOC_Os05g39590	IVb				IV	p28 144	Pp1s28_144	0
	IVa-3						AT2G40340 (contain intron in CDS)	IVa	A-2						IV	p292 5	Pp1s292_5	0
	IVa-3						AT2G40350	IVa	A-2						IV	p7 352	Pp1s7_352	0
	IVb-1	JcERF025		10		29814.m000739	AT2G40220	IVb	A-3	LOC_Os05G28350	IVb	no			IV	p81 44	Pp1s81_44	5
	IVb-2	JcERF028		6		27810.m000639	AT3G57600	IVb	A-2	LOC_Os03g07830	IVb	VvERF040	IV	chr8 20533762 20534625 -
	IVb-3	JcERF027		4		30170.m014115	AT1G75490	IVb	A-2	LOC_Os08g45110	IVb	VvERF039	IV	chr18 11207154 11207759 +
	IVb-3						AT5G18450	IVb	A-2
	IVb-4	JcERF026		6		29680.m001737						VvERF036	IV	chr4 9711936 9712533 +
												VvERF038	IV	chr8 8519463 8537744 -
ERF (Group B)	Va-1	JcERF036	4	2		29841.m002846	AT1G15360	Va	B-6	LOC_Os02g10760	Va	VvERF042	V	chr9 6640052 6651269 -	Va	p21 214	Pp1s21_214	4
	Va-1	JcERF037	4	11		28320.m001139	AT5G11190	Va	B-6	LOC_Os06g40150	Va	VvERF043	V	chr11 4635321 4638763 -	Va	p79 25	Pp1s79_25	4
	Va-1	JcERF038	4	11		29848.m004632	AT5G25390	Va	B-6			VvERF044	V	chr4 4885421 4886327 -
	Va-2	JcERF039	4	2		29588.m000873	AT5G25190	Va	B-6	LOC_Os02g55380	Va	VvERF045	V	chr4 5691911 5692945 -
	Va-2	JcERF040	4	11		29848.m004566				LOC_Os04g56150	Va	VvERF046	V	chr9 9199781 9200495 -
	Va-2									LOC_Os06g08340	Va	VvERF047	V	chr9 9238629 9239402 -
	Vb	JcERF044		8		30174.m009031	AT5G19790	Vb	B-6	LOC_Os07g10410	Vb	VvERF041	V	chr15 6573390 657406 +	Vb	p195 38	Pp1s195_38	0
	Vb	JcERF045		8		30174.m008961				LOC_Os07g38750	Vb	VvERF048	V	chr17 4718975 4719664 -	Vb	p233 111	Pp1s233_111	1
	Vb	JcERF046		11		30068.m002623				LOC_Os12g39330	Vb	VvERF049	V	chr14 19077136 19078335 +	Vb	p64 47	Pp1s64_47	1
	Vb	JcERF049		1		30084.m000185						VvERF052	VI	chr2 2618663 2633751 +
	Vb	JcERF047		9		29635.m000461						VvERF050	V	chr6 661284 662096 -
	Vb	JcERF048		4		29813.m001543						VvERF051	V	chr8 19894471 19895253 +
	Vb	JcERF050		6		29950.m001119**
	VIa	JcERF054		4		28641.m000082	AT2G46310	VI	B-5	LOC_Os05g25260	VI	VvERF055	VI	chr6 8899829 8900686 -
	VIa	JcERF055		8		28049.m000300	AT3G61630	VI	B-5			VvERF056	VI	chr15_random 3548297 3549241 +
	VIb-1	JcERF056		5		30169.m006542	AT1G22985	VI	B-5	LOC_Os01g12440	VI	VvERF054	VI	chrUn_random 39153503 39154528 -
	VIb-1	JcERF057		9		30190.m010791	AT1G71130	VI	B-5	LOC_Os01g46870	VI	VvERF053	VI	chr2 848681 849664 +
	VIb-1						AT4G23750	VI	B-5	LOC_Os06g06540	VI
	VIb-1						AT4G27950	VI	B-5
	VIb-1						AT5G53290	VI	B-5
	VIb-2						AT4G11140	VI	B-5
	VIIa-1	JcERF077	5	8		29986.m001656	AT1G53910	VIIa	B-2	LOC_Os02g54160	VIIa	VvERF057	VII	chr7 3811031 3812408 +
	VIIa-1	JcERF079	5	2		27585.m000144	AT3G14230	VIIa	B-2	LOC_Os03g08460	VIIa	VvERF059	VII	chr9 350947 353830 +
	VIIa-1									LOC_Os03g08470	VIIa
	VIIa-1									LOC_Os06g09390	VIIa
	VIIa-1									LOC_Os07g42510	VIIa
	VIIa-1									LOC_Os09g11480	VIIa
	VIIa-1									LOC_Os09g26420	VIIa
	VIIa-1									LOC_Os09g11460	VIIb
	VIIa-2	JcERF078	5	1		29726.m004094	AT1G72360	VIIa	B-2	LOC_Os01g21120	VIIa	VvERF058	VII	chr5 449616 450828 +
	VIIa-2						AT2G47520	VIIa	B-2	LOC_Os03g08490	VIIa
	VIIa-2						AT3G16770	VIIa	B-2	LOC_Os03g08500	VIIa
	VIIa-2									LOC_Os03g22170	VIIa
	VIIa-2									LOC_Os05g29810	VIIa
	VIIa-2									LOC_Os07g47790	VIIa
	VIIa-2									LOC_Os10g25170	VIIa
	VIIIa-1	JcERF076		3	T4	30190.m011323	AT1G28360	VIIIa	B-1	LOC_Os05g41760	VIIIa	VvERF061	VIII	chr10 240466 253282 +	VIIIa	p105 212	Pp1s105_212	1
	VIIIa-2	JcERF074		1	T2	29640.m000403	AT1G50640	VIIIa	B-1	LOC_Os02g06330	VIIIa	VvERF060	VIII	chrUn_random 14387590 14388105 -	VIIIa	p124 33	Pp1s124_33	0
	VIIIa-2	JcERF075		1	T2	no	AT3G20310	VIIIa	B-1	LOC_Os02g09650	VIIIa	VvERF062	VIII	chr19 7114748 7115423 +	VIIIa	p127 75	Pp1s127_75	1
	VIIIa-2									LOC_Os04g57340	VIIIa	VvERF065	VIII	chr7 325016 326212 +	VIIIa	p149 253	Pp1s149_253	1
	VIIIa-2									LOC_Os06g47590	VIIIa	VvERF066	VIII	chr12 6414032 6415169 -	VIIIa	p487 24	Pp1s487_24	1
	VIIIa-3	JcERF063		7		29983.m003147	AT1G03800	VIIIa	B-1	LOC_Os01g58420	VIIIa	VvERF064	VIII	chr10 253336 254456 -	VIIIa	p90 184	Pp1s90_184	0
	VIIIa-3	JcERF064		8		29983.m003147	AT1G28370	VIIIa	B-1	LOC_Os04g52090	VIIIa	VvERF063	VIII	chr19 2367840 2368502 +	VIIIb	p121 50	Pp1s121_50	5
	VIIIa-3	JcERF065		3	T4	30190.m011321	AT1G53170	VIIIa	B-1	LOC_Os05g41780	VIIIa				VIIIb	p130 106	Pp1s130_106	1
	VIIIa-3	JcERF066		1		27904.m000217	AT3G15210	VIIIa	B-1	LOC_Os06g42990	XII				VIIIb	p138 190	Pp1s138_190	1
	VIIIa-3						AT5G44210	VIIIa	B-1						VIIIb	p14 303	Pp1s14_303	1
	VIIIb-1	JcERF083		7		29792.m000600	AT1G12890	VIIIb	B-1	LOC_Os02g32040	VIIIb	VvERF067	VIII	chrUn_random 57868167 57903613 -	VIIIb	p145 10	Pp1s145_10	1
	VIIIb-1	JcERF088		1		29726.m004013	AT1G12980	VIIIb	B-1	LOC_Os02g38090	VIIIb	VvERF068	VIII	chr5 3279544 3298130 -	VIIIb	p15 480	Pp1s15_480	1
	VIIIb-1	JcERF089		2		30131.m006951	AT1G24590	VIIIb	B-1	LOC_Os04g32790	VIIIb	VvERF070	VIII	chr14 13828826 13829608 -	VIIIb	p19 272	Pp1s19_272	5
	VIIIb-1	JcERF090		6		30128.m008571	AT1G28160	VIIIb	B-1	LOC_Os07g47330	VIIIb	VvERF069	VIII	chr9 16459639 16482889 -	VIIIb	p20 184	Pp1s20_184	5
	VIIIb-1					28644.m000942	AT5G13910	VIIIb	B-1	LOC_Os08g07700	VIIIb				VIIIb	p204 42	Pp1s204_42	1
	VIIIb-1						AT5G18560	VIIIb	B-1						VIIIb	p23 8	Pp1s23_8	0
	VIIIb-2	JcERF098		2		27446.m000475	AT1G80580	VIIIb	B-1			GSVIVG01017542001	no	chr9: 10245402 - 10246292	VIIIb	p276 72	Pp1s276_72	1
	IXa-1	JcERF082		8	T11	30174.m008757	AT2G44840	IXa	B-3			VvERF072	IX	chr15 2756432 2789701 +	VIIIb	p340 16	Pp1s340_16	0
	IXa-1	JcERF085		8		30174.m008756						VvERF073	IX	chr15 2772146 2772763 -	VIIIb	p345 35	Pp1s345_35	5
	IXa-1	JcERF087		8	T11	30174.m008759						VvERF074	IX	chr15 2776827 2777609 -	VIIIb	p5 432	Pp1s5_432	1
	IXa-1	JcERF084		8	T11	30174.m008758**									VIIIb	p6 75	Pp1s6_75	1
	IXa-1	JcERF086		8	T11	30174.m008755									VIIIb	p74 86	Pp1s74_86	1
	IXa-2	JcERF080		9	T12	28192.m000255	AT4G17500	IXa	B-3	LOC_Os02g43790	IXa	VvERF076	IX	chrUn_random 60826220 60827068 +	IX	p2 404	Pp1s2_404	0
	IXa-2	JcERF081		5	T7	30147.m014331	AT5G47220	IXa	B-3	LOC_Os04g46220	IXa	VvERF077	IX	chr16 5416471 5417193 -	IX	p2 410	Pp1s2_410	0
	IXb	JcERF072		5		30147.m014329	AT4G17490	IXb	B-3	LOC_Os02g43820	IXb	VvERF092	IX	chr16 5831530 5832258 +	IX	p38 257	Pp1s38_257	0
	IXb	JcERF069		9	T12	28552.m000029	AT5G07580	IXb	B-3	LOC_Os04g46240	IXb	VvERF078	IX	chrUn_random 60809015 60810037 -	IX	p289 49	Pp1s289_49	0
	IXb	JcERF070		9	T12		AT5G47230	IXb	B-3	LOC_Os04g46250	IXb	VvERF079	IX	chr16 5451396 5452229 +	IX	p38 262	Pp1s38_262	5
	IXb	JcERF071	?	1		27401.m000291	AT5G61590	IXb	B-3	LOC_Os10g41330	IXb	VvERF080	IX	chr16 5491634 5492467 +	IX	p60 148	Pp1s60_148	1
	IXb	JcERF073		5	T7	27401: 145769..146566	AT5G51190	IXb	B-3			VvERF081	IX	chr16 5508169 5508993 +
	IXb						AT5G61600	IXb	B-3			VvERF082	IX	chr16 5521385 5522212 +
	IXb											VvERF104	IX	chr16 5542043 5542876 +
	IXb											VvERF083	IX	chr16 5555711 5556535 +
	IXb											VvERF084	IX	chr16 5558723 5559529 -
	IXb											VvERF105	IX	chr16 5607080 5633905 +
	IXb											VvERF106	IX	chr16 5634411 5637047 +
	IXb											VvERF107	IX	chr16 5657368 5658243 +
	IXb											VvERF108	IX	chr16 5669631 5671128 +
	IXb											VvERF085	IX	chr16 5690233 5691060 +
	IXb											VvERF086	IX	chr16 5760826 5761674 -
	IXb											VvERF087	IX	chr16 5765077 5766152 -
	IXb											VvERF088	IX	chr16 5798321 5799157 -
	IXb											VvERF089	IX	chr16 5801756 5806682 -
	IXb											VvERF090	IX	chr16 5807138 5807974 -
	IXb											VvERF091	IX	chr16 5811388 5829932 -
	IXc-1	JcERF067		3	T3	29900.m001561	AT4G18450	IXc	B-3	LOC_Os01g54890	IXa	VvERF095	IX	chr10 631074 631907 -
	IXc-1	JcERF097		3	T3	29900.m001559				LOC_Os05g49010	IXc	VvERF075	IX	chr10 627970 628754 +
	IXc-2	JcERF094		7	T9	29584.m000234	AT1G06160	IXc	B-3	LOC_Os03g64260	IXc	VvERF093	IX	chrUn_random 14831915 14832541 +
	IXc-2	JcERF095		6		29680.m001678	AT2G31230	IXc	B-3	LOC_Os05g37640	IXc	VvERF099	IX	chr7 6442513 6443815 +
	IXc-2	JcERF096		1	T1	29895.m000321	AT3G23240	IXc	B-3	LOC_Os07g22730	IXc	VvERF100	IX	chr7 6458231 6458911 +
	IXc-2									LOC_Os07g22770	IXc	VvERF101	IX	chr7 6461549 6469409 +
	IXc-2									LOC_Os09g39850	IXc	VvERF102	IX	chr7 6495922 6497480 +
	IXc-2											VvERF111	IX	chr5 7429926 7430552 +
	IXc-2											VvERF103	IX	chr7 6505681 6506337 +
	IXc-3	JcERF068		7	T9	29584.m000237	AT1G04370	IXc	B-3	LOC_Os08g44960	IXc	VvERF094	IX	chr7 6427909 6428346 +
	IXc-3	JcERF093		1	T1	29603.m000510	AT3G23220	IXc	B-3	LOC_Os09g39810	IXc	VvERF096	IX	chr7 6424448 6424897 +
	IXc-3						AT5G43410	IXc	B-3			VvERF097	IX	chr7 6426284 6428346 +
	IXc-3											VvERF109	IX	chr5 7403353 7403721 +
	IXc-4	JcERF091		1	T1	29603.m000509	AT3G23230	IXc	B-3	LOC_Os03g05590	IXc	VvERF071	IX	chr7 6422530 6423000 +
	IXc-4	JcERF092		7	T9	29584.m000235				LOC_Os04g18650	IXc	VvERF098	IX	chr7 6430148 6430606 -
	IXc-4									LOC_Os10g30840	IXc	VvERF110	IX	chr5 7410487 7410945 -
	Xa/c	JcERF058	5	7		27965.m000108	AT5G64750	Xa	B-4	LOC_Os02g34260	Xa	VvERF112	X	chr1 15210308 15212572 +	X	p117 32	Pp1s117_32	1
	Xa/c	JcERF059	5	4		29863.m001066	AT1G43160	Xa	B-4	LOC_Os02g34270	Xa	VvERF113	X	chr7 13227630 13228959 -	X	p136 219	Pp1s136_219	0
	Xa/c	JcERF060	5	5		30147.m014403	AT5G07310	Xa	B-4	LOC_Os04g34970	Xa	VvERF114	X	chr18_random 1519674 1551066 -	X	p160 12	Pp1s160_12	5
	Xa/c	JcERF062	5	6		30128.m008556	AT5G13330	Xa	B-4	LOC_Os01g64790	Xa	VvERF118	X	chr17 105158 107772 -	X	p259 104	Pp1s259_104	1
	Xa/c	JcERF061	5	2		30131.m006971	AT5G50080	Xa	B-4	LOC_Os11g06770	Xa	VvERF120	X	chr14 14000934 14019590 -	X	p31 112	Pp1s31_112	5
	Xa/c						AT5G61890	Xa	B-4	LOC_Os04g32620	Xa				X	p67 144	Pp1s67_144	5
	Xa/c						AT2G33710	Xc	B-4	LOC_Os05g36100	Xc
	Xa/c									LOC_Os02g32140	Xc
	Xa/c									LOC_Os07g12510	VI
	Xb-1	JcERF042		10	T14	29801.m003186	AT4G34410	Xb	B-3	LOC_Os02g52670	Xb	VvERF117	X	chr3 5393097 5393840 -
	Xb-1	JcERF043**		10	T14					LOC_Os08g36920	Xb
	Xb-1									LOC_Os09g28440	Xb
	Xb-2	JcERF041		7		30115.m001193						?VvERF115	X	Chr7 11996082 11996694 +
	Xb-2											?VvERF119	X	chr7 12003645 12007872 +
	Xb-2											?VvERF116	X	chr7 12011941 12012588 +
	Xb-L						AT2G20350	Xb-L	B-6
	Xb-L						AT5G67000	Xb-L	B-6
	Xb-L						AT5G67010	Xb-L	B-6
	VI-La	JcERF051		8		no	AT1G49120	VI-L	B-6	LOC_Os01g04020	VI-L	VvERF121	VI-L	chr17 3709780 3710467 -	Bx	p126 30	Pp1s126_30	0
	VI-La	JcERF052		8		no				LOC_Os09g13940	VI-L				Bx	p21 239	Pp1s21_239	0
	VI-Lb	JcERF053	5`-UTR	5		27524.m000298	AT1G25470	VI-L	B-6			VvERF122	VI-L	chr1 3126422 3128031 +	Bx	p21 247	Pp1s21_247	0
	VI-Lb						AT1G68550	VI-L	B-6						Bx	p293 53	Pp1s293_53	0
	VI-Lb						AT3G25890	VI-L	B-6						Bx	p293 60	Pp1s293_60	0
	VI-Lc									LOC_Os08g27220	VI-L				Bx	p30 284	Pp1s30_284	0
	XI									LOC_Os12g41030	XI				Bx	p7 472	Pp1s7_472	0
	XI									LOC_Os12g41060	XI				Bx	p7 481	Pp1s7_481	0
	？									LOC_Os03g60120 (B5)	VI
RAV	RAV	JcRAV1		unknown		29650.m000279	AT1G50680			LOC_Os01g04750		VvRAV1		chr1 2734008 2735084 +	RAV	P135 69	Pp1s135_69
	RAV	JcRAV2		11		28008.m000029	AT1G51120			LOC_Os01g04800		VvRAV2		chr14 11247936 11248790 -	RAV	P63 80	Pp1s63_80
	RAV	JcRAV3		9		28192.m000250	AT3G25730			LOC_Os01g49830		VvRAV3*	only B3	chr2 2471749 2472984 +
	RAV	JcRAV4		5		29738.m001050	AT1G13260			LOC_Os05g47650		VvRAV4		chr15 7138317 7139555 -
	RAV						AT1G25560					VvRAV5*	only B3	chr8 15799303 15800740 +
	RAV						AT1G68840					VvRAV6		chr11 5614299 5653244 -
Soloist	Soloist	JcSol	10	7		30217.m000254	AT4G13040			LOC_Os02g29550		VvSol		chrUn_random 66735941 66742714	Soloist	P317 72	Pp1s317_72	10
															Soloist	P93 77	Pp1s93_77	10
															Soloist (BTB/POZ domain +AP2/ERF domain)	P146 84	Pp1s146_84	10
															Soloist (BTB/POZ domain +AP2/ERF domain)	P37 156	Pp1s37_156	10
AP2	ANTa	JcAP2-01	6+7	7		29929.m004537	AT1G51190			LOC_Os11g19060		VvAP2-03		chr6 2210631 2213148 -	ANT (two AP2 domain)	P131 131	Pp1s131_131	6+7
	ANTa	JcAP2-02	6+7	5		29562.m000029	AT1G72570			LOC_Os01g67410		VvAP2-05		chr4 12212544 12216736 +	ANT (two AP2 domain)	P131 139	Pp1s131_139	6+7
	ANTa	JcAP2-03	6+7	7		27482.m000151	AT3G20840			LOC_Os02g40070		VvAP2-09		chr11 12569376 12571929 -	ANT (two AP2 domain)	P17 137	Pp1s17_137	6+7
	ANTa	JcAP2-04	6+7	11		29763.m000186	AT4G37750			LOC_Os02g51300		VvAP2-10		chr9 1146981 1149677 -	ANT (two AP2 domain)	P261 59	Pp1s261_59	6+7
	ANTa	JcAP2-05	6+7	2		29706.m001286	AT5G10510			LOC_Os03g07940		VvAP2-16		chrUn_random 75647190 75651575 -	ANT (two AP2 domain)	P294 22	Pp1s294_22	6+7
	ANTa	JcAP2-06	6+7	4		30170.m013669+30170.m013668	AT5G17430			LOC_Os03g12950		VvAP2-19		chr18 6956592 6960372 -	ANT (two AP2 domain)	P32 65	Pp1s32_65	6+7
	ANTa	JcAP2-07	6+7	7		28976.m000163	AT5G57390			LOC_Os03g19900		VvAP2-04*	single ERF domain	chr4 12219424 12221890 +	ANT (two AP2 domain)	P66 255	Pp1s66_255	6+7
							AT5G65510			LOC_Os03g56050		VvAP2-07*	single ERF domain	chr8 20353759 20356830 -	ANT (two AP2 domain)	P66 282	Pp1s66_282	6+7
										LOC_Os04g42570		VvAP2-18*	single ERF domain	chr7 10120576 10122045 -	ANT (two AP2 domain)	P72 220	Pp1s72_220	6+7
										LOC_Os04g55970					ANT (two AP2 domain)	P14 439	Pp1s14_439	6+7
										LOC_Os08g07440
										LOC_Os06g44750
										LOC_Os07g03250
	ANTb	JcAP2-08	6+7	11		30114.m000507	AT3G54320			LOC_Os08g34360		VvAP2-01		chr11 7485191 7487892 +
	ANTb	JcAP2-09	6+7	10		30069.m000440	AT1G79700			LOC_Os09g25600		VvAP2-02		chr14 18069761 18071690 +
	ANTb	JcAP2-10	6+7	3		29822.m003477	AT1G16060			LOC_Os11g03540		VvAP2-06		chr9 12855035 12858338 +
	ANTb	JcAP2-11	6+7	3		29736.m002029				LOC_Os05g45954		VvAP2-08		chr1 9710621 9712381 -
						30131.m006896				LOC_Os06g05340		VvAP2-20*	single ERF domain	chrUn_random 125857565 125860561
										LOC_Os12g03290
										LOC_Os01g59780
	ANTc (single ERF domain)	JcAP2-12	6	6		30006.m000282	AT2G41710					GSVIVT01033273001 (single ERF domain)	no	chr8 21,956,911..21,961,543 -
？		no				27810.m000669									AP2 ? (two AP2 domains)	P11 198	Pp1s11_198
	AP2	JcAP2-13	8+9	10		29923.m000827	AT2G28550			LOC_Os03g60430		VvAP2-11		chr13 4825637 4829186 +	AP2	P83 93	Pp1s83_93	8+9
	AP2	JcAP2-14	8+9	7	T10	29805.m001494	AT5G67180			LOC_Os04g55560		VvAP2-13		chr7 11563494 11567079 +	AP2 ? (single AP2 domain)	P11 200	Pp1s11_200
	AP2	JcAP2-15	8+9	2		28752.m000339	AT4G36920			LOC_Os05g03040		VvAP2-14		chr8 13018211 13019864 -	AP2 ? (four AP2 domains)	P2 576	Pp1s2_576
	AP2	JcAP2-16	8+9	6		29169.m000017	AT2G39250	single ERF domain		LOC_Os06g43220		VvAP2-12*	one ERF domain	chr6 4473953 4475019 -	AP2 ? (four AP2 domains)	P2 692	Pp1s2_692
	AP2						AT3G54990	single ERF domain		LOC_Os07g13170		VvAP2-15*	one ERF domain	chr6 4471184 4473885 -	AP2 ? (three AP2 domains)	P95 69	Pp1s95_69
	AP2						AT5G60120	single ERF domain

## Sheet: S3B Table
(B) Tandem duplications in the physic nut genome and their orthologs in the genomes of other plant species.
Tandem duplicators	Physic nut		Subfamily-Subgroup	Arabidopsis	Rice	Vitis vinifera ( Licausi et al., 2010)		Other species from phytozome (http://phytozome.jgi.doe.gov/pz/portal.html)
	LGs	Gene name				Gene name	Vitis chromosome location
T6	5	JcERF016	IIIb	AT1G12630	Os02g45420	VvERF019	chr16_random 4321713..4322426 +
T6	5	JcERF003	IIIc	AT1G12610	Os02g45450	VvERF022	chr16_random 4345734..4346390 +
T8	6	JcERF007	IIIb	AT1G63040	Os04g48330	VvERF018	chr2 3849494..3850054 +
T8	6	JcERF005	IIIc	AT1G63030	Os04g48350	VvERF021	chr2 3874834..3875568 +
T13	9	JcERF015	IIIb	AT5G52020
T13	9	JcERF001	IIIc	AT5G51990
T13	9	JcERF002	IIIc
T7	5	JcERF081	IXa-2	AT4G17500	Os02g43790	VvERF077	chr16 5416471..5417193 -
T7	5	JcERF073	IXb	AT4G17490	Os02g43820	VvERF079	chr16 5451396 5452229 +
T12	9	JcERF080	IXa-2	AT5G47220	Os04g46220	VvERF076	chrUn_random 60826220..60827068 +
T12	9	JcERF069	IXb	AT5G47230	Os04g46240	VvERF078	chrUn_random 60809015..60810037 -
T12	9	JcERF070	IXb		Os04g46250
T9	7	JcERF094	IXc-2	AT3G23240	Os09g39850	VvERF111	chr5 7429926..7430552 +
T9	7	JcERF092	IXc-4	AT3G23230		VvERF110	chr5 7410487..7410945 -
T9	7	JcERF068	IXc-3	AT3G23220	Os09g39810	VvERF109	chr5 7403353..7403721 +
T1	1	JcERF096	IXc-2			VvERF099	chr7 6442513..6443815 +
T1	1	JcERF091	IXc-4			VvERF098	chr7 6430148..6430606 -
T1	1	JcERF093	IXc-3			VvERF094	chr7 6427909..6428346 +
T10	7	JcAP2-14	AP2	AT5G67180	Os04g55560	VvAP2-13	chr7 11563494..11567079 +
T10	7	JcERF017	IIa	AT5G67190	Os04g55520	VvERF007	chr7 11530595..11531053 +
			IIb-1		Os06g09760
T15	11	JcERF023	IIb-1		Os06g09790
T15	11	JcERF024	IIb-1		Os06g09810	VvERF009	chr11 622859..623476 +
T15	11	JcERF022	IIb-3			VvERF010	chr11 630589..631251 +
T5	4	JcERF013	IIIa-1			VvERF014	chr18 16772806..16773341 -
T5	4	JcERF014	IIIa-1			VvERF016	Chr18 16785242..16785789 -
T4	3	JcERF076	VIIIa-1	AT1G28360	Os05g41760	VvERF061	chr10 240466..253282 +
T4	3	JcERF065	VIIIa-3	AT1G28370	Os05g41780	VvERF064	chr10 253336..254456 -
								Manihot esculenta: scaffold03332:79672..83385
T2	1	JcERF074	VIIIa-2					ATGAGGAGAGGAAGAGGAGCCGCCGCCCCTAAACAGGTCGTGGAACCAAATGGATCAGCACCTCAAAATATCGTAAATGGAAAAGAGCCCAGATACAGAGGAGTCCGGAAAAGACCGTGGGGCAGATTTGCCGCTGAGATCAGAGATCCCTGGAAAAAAACGAGGGTCTGGCTCGGCACATTCGACTCAGCGGAGGATGCTGCTCGTGCCTACGACGCCGCTGCACGCTCCCTCCGTGGTCCCAAGGCCAAAACCAATTTTATTTCCGACTCCCATTTATCTCCTTTCACCTACCAAAACCCCCCACACCCTTTCATGGATCACAGATTATATACATCAAATGGGTTTCACGAGCATCACGTAATTCCACAGAGACCCGCATCTAGCAGTCAGAGCAGT…
T2	1	JcERF075	VIIIa-2					ATGAGGAGAGGAAGGGGAGGAGGCGCCACCACTATTGCAGCTGAGCAGGTCGTGGAACCAAACAGATCTGCACCTCAGAATATCATCAATGGTAAAGAGCCCAAATACAGAGGAGTCCGGAAAAGGCCATGGGGAAGATACGCCGCTGAGATCAGAGATCCCCTGAAAAAGACGAGGGTCTGGCTGGGTACCTACGACTCTGCCGAGGACGCTGCTCGTGCATACGATGCCGCAGCTCGCACCTTCCGCGGACCCAAAGCCAAAACCAATTTTCCCATTCCTGCCTCCCATTTATCCCCTTTTACCAACCAAAATTTCCCAGACTCGTTCATGGATCATAGGATATACACAACAAATGGGTTTGAAGAGCATCACGTAAATGCTCAAAGACCCACATCT…
T11	8	JcERF082	IXa-1			VvERF072	chr15 2756432..2789701 +
T11	8	JcERF087	IXa-1			VvERF073	chr15 2772146..2772763 -
T11	8	JcERF084	IXa-1			VvERF074	chr15 2776827..2777609 -
T11	8	JcERF086	IXa-1
T3	3	JcERF067	IXc-1			VvERF075	chr10 627970..628754 +
T3	3	JcERF097	IXc-1			VvERF095	chr10 631074..631907 -
								Fragaria vesca: LG3:21,124,051..21,131,303
T14	10	JcERF042	Xb-1					ATGCAAAACATCTTCAAGCGATCCAAACTCGACACCGCCGGAGCACCACCAAAGTCGACCGGAAACCCACTTCCTCCGCCGCCTCTCCGCCTCACCCACGAGCAAGAACTCGCCGTAATCGTCTCAGCTCTCCGTAACGTCATCGCCGGCACCACCACCACCATGGACTTCAACTCGCTCTTCCCTTCCTACCACATCCTTGCAGCATCCGACGCCGATCGTTGTCCTGTTTGTAACATCAAAGGTTGTCTTGGATGCAATTTTTTCCCGCCACCAGCTCAGGAGGAGAACAACATTAACAGCAGCAACAAGAAGGGACCCAAAAAGAGGGTGAAGAAGAACTACAGGGGAGTGAGGCAGCGGCCTTGGGGAAAATGGGCCGCCGAAATCCGAGACCCG…
T14	10	JcERF043	Xb-1					ATGCAAAACTCCTTCAAGCGATCCAAATTCGACACTGCCGGAGCTCCACCACAGTTGACCCAAAACCCACTTCCTCCGCCGCCTCCCCATCTCACTCACGACCAAGAACTCGCCGTAATCGTCTCCGCTCTTCAAAACGTCATCGCCGGCACCACCACCACCATGGACTTCAACTCTCTCTTCCCTTCCTACCACTGCCCCACCCTCACTTCCTCCTCATCCTCCGCTCCCGCCCTCCTTGCAGCATCCGACGCCGACACGTGTCCCGTCTGTAACATTAAAGGTTGTCTTGGATGCAATTTTTTCCCGCCACCAGCTCA GGAGGAGAACAACATTAACAGCAACAACAAGAAGGGACCCAAGAAAAGGGTGAAGAAGAACTACAGGGGAGTGAGGCA…
